# Supplementary material for: Fabrication of double core–shell Si-based anode materials with nanostructure for lithium-ion battery
Source: Royal Society of Chemistry journal article supplement (doi:10.1039/c7ra13606d), 2018-01-01
Supplement: c7ra13606d1.pdf [file c7ra13606d1.pdf]

### Supplementary information

**Figure S1.** Pathways of lithium-ion transport in two different structures

**Figure S2.** SEM images of the anode before and after the cycling tests for 23 cycles, in which the current density cycle is  $100 \text{ mA g}^{-1}$  for the first three cycles and  $500 \text{ mA g}^{-1}$  for the followed 20 cycles. The top-view images were shown in the left while the cross-section was laid in the right. a) and b) anode before cycling, c) and d) Si@C-1@SiO<sub>2</sub> after cycling. e) and f) Si@C@SiO<sub>2</sub> after cycling.

**Figure S3.** Schematic illustration of the possible structure evolutions of double core-shell Si@C-1@SiO<sub>2</sub> and Si@C@SiO<sub>2</sub> during cycling

**Table S1.** The comparison of the performance and preparation method between this paper and previous work

Figure S1

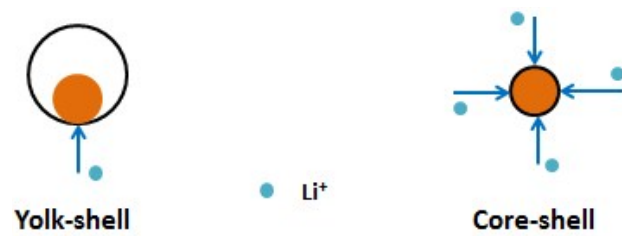

Figure S2

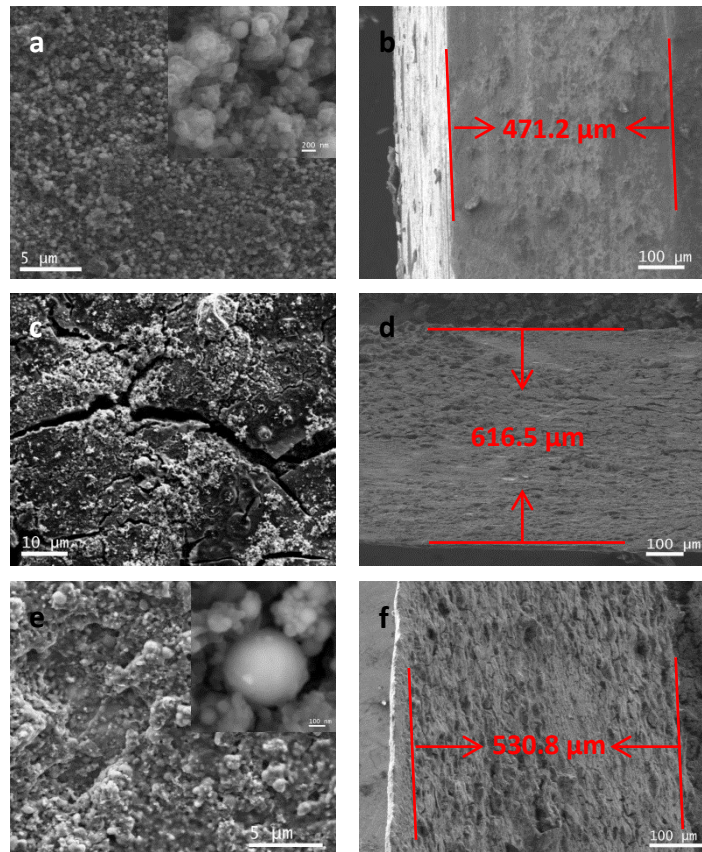

Figure S3

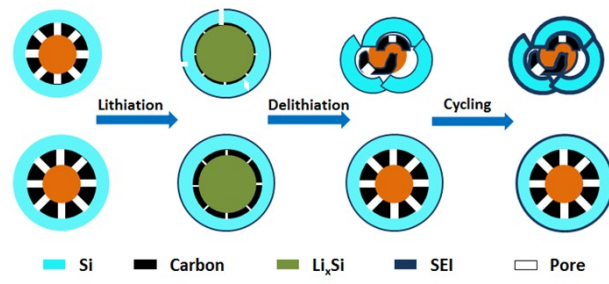

Table S1

| Anode materials                               | Graphene preparation method  | Graphene content (wt%) | Initial CE | Initial capacity                                     | Capacity remained       | Current density        | Ref.      |
|-----------------------------------------------|------------------------------|------------------------|------------|------------------------------------------------------|-------------------------|------------------------|-----------|
| <b>C coated Si microparticles/RGO</b>         | GO Ar/H <sub>2</sub> reduced | ~9.7%                  | 91.1%      | 1947 mAh g <sup>-1</sup> at 200 mA g <sup>-1</sup>   | 73% after 157 cycles    | 200 mA g <sup>-1</sup> | 1         |
| <b>C coated Si nanoparticles/RGO</b>          | GO Ar/H <sub>2</sub> reduced | —                      | ~71%       | 4209 mAh g <sup>-1</sup> at 200 mA g <sup>-1</sup>   | ~38.1% after 350 cycles | 2 A g <sup>-1</sup>    | 2         |
| <b>Si nanoparticles/nanographene</b>          | CVD graphene growth          | ~8%                    | 83.4%      | 2330 mAh g <sup>-1</sup> at 250 mA g <sup>-1</sup>   | 95% after 510 cycles    | 500 mA g <sup>-1</sup> | 3         |
| <b>Si nanoparticles/RGO</b>                   | GO Ar/H <sub>2</sub> reduced | ~60%                   | 83%        | 645 mAh g <sup>-1</sup> at 50 mA g <sup>-1</sup>     | 98.5% after 100 cycles  | 50 mA g <sup>-1</sup>  | 4         |
| <b>2D Ag coated Si nanoparticles/RGO</b>      | GO N <sub>2</sub> reduced    | ~10%                   | 70%        | 2419 mAh g <sup>-1</sup> at 100 mA g <sup>-1</sup>   | 70.2% after 100 cycles  | 1 A g <sup>-1</sup>    | 5         |
| <b>Microsized porous silicon/graphenen</b>    | GO aluminum reduced          | ~80%                   | 80.96%     | ~3150 mAh g <sup>-1</sup> at 1000 mA g <sup>-1</sup> | 39.9% after 300 cycles  | 1 A g <sup>-1</sup>    | 6         |
| <b>Yolk-shell Si@RGO/a-c</b>                  | GO Ar reduced                | ~6%                    | 76 %       | ~2200 mAh g <sup>-1</sup> at 400 mA g <sup>-1</sup>  | 75% after 101cycles     | 400 mA g <sup>-1</sup> | 7         |
| <b>Double core-shell Si nanoparticles/RGO</b> | GO Ar/H <sub>2</sub> reduced | ~8.1%                  | 80.7%      | 1263 mAh g <sup>-1</sup> at 100 mA g <sup>-1</sup>   | 91% after 500 cycles    | 500 mA g <sup>-1</sup> | This work |

1. X. Han, H. Chen, Z. Zhang, D. Huang, J. Xu, C. Li, S. Chen and Y. Yang, *Journal of Materials Chemistry A*, 2016, **4**, 17757-17763.
2. Z. Liu, P. Guo, B. Liu, W. Xie, D. Liu and D. He, *Applied Surface Science*, 2017, **396**, 41-47.
3. C. Zhang, T.-H. Kang and J.-S. Yu, *Nano Research*, 2018, **11**, 233-245.
4. C. Botas, D. Carriazo, W. Zhang, T. Rojo and G. Singh, *ACS Applied Materials & Interfaces*, 2016, **8**, 28800-28808.
5. W. Yao, Y. Cui, L. Zhan, F. Chen, Y. Zhang, Y. Wang and Y. Song, *Applied Surface Science*, 2017, **425**, 614-621.
6. W. Zhai, Q. Ai, L. Chen, S. Wei, D. Li, L. Zhang, P. Si, J. Feng and L. Ci, *Nano Research*, 2017, **10**, 4274-4283.
7. M.-H. Lin, S. Hy, C.-Y. Chen, J.-H. Cheng, J. Rick, N.-W. Pu, W.-N. Su, Y.-C. Lee and B.-J. Hwang, *ChemElectroChem*, 2016, **3**, 1446-1454.
